# Supplementary material for: Optimizing drip fertigation at different periods to improve yield, volatile compounds and cup quality of Arabica coffee
Source: Front Plant Sci. 2023 Jun 2;14:1148616. doi: 10.3389/fpls.2023.1148616 (PMC10272449; doi:10.3389/fpls.2023.1148616)
Supplement: Supplementary file 1 [file DataSheet_1.xlsx]

## Sheet: Volatile compounds
Retention time	Compounds	Relative Content (%)
		MFL250BE250BR250	DFL250BE250BR250	MFL150BE250BR350	DFL150BE250BR350	MFL150BE350BR250	DFL150BE350BR250	MFL250BE150BR350	DFL250BE150BR350	MFL250BE350BR150	DFL250BE350BR150	MFL350BE150BR250	DFL350BE150BR250	MFL350BE250BR150	DFL350BE250BR150
	Furans	32.71	33.42	34.04	34.42	35.95	36.53	33.71	34.08	35.74	37.8	34.38	34.57	37.74	34.52
34.247	Furfural	5.25	3.98	5.13	4.03	4.97	4.35	4.58	4.21	4.81	4.3	4.6	3.35	5.09	2.93
37.294	2-Acetylfuran	1.2	1.37	1.49	1.49	1.62	1.56	1.37	1.29	1.58	1.49	1.29	1.2	1.63	1.7
40.485	Furfuryl acetate	2.09	3.34	3	3.79	3.02	3.35	2.86	3.52	3.66	4.03	3.08	3.83	3.6	5.54
42.471	5-Methylfurfural	4.52	4.95	5.37	5.07	5.56	5.22	4.84	5.01	5.21	5.27	4.9	4.57	5.81	4.07
42.84	2-Propionylfuran	0.24	0.4	0.28	0.54	0.33	0.65	0.49	0.6	0.18	0.62	0.48	0.59	0.45	0.22
50.068	Furfuryl alcohol	12.67	12.8	11.87	12.66	11.75	13.07	12.42	12.75	13.18	14.31	12.5	13.79	12.61	14.16
52.237	Furfuryl pentanoate	ND	0.24	ND	0.24	ND	0.23	ND	0.26	ND	0.27	0.23	0.29	ND	0.35
54.53	(5-methyl-2-furan)Methanol	0.26	ND	0.23	ND	0.19	0.17	0.21	ND	0.26	ND	0.22	ND	0.2	ND
63.298	5-Methyl-2-acetylfuran	1.14	1.87	1.69	2.09	2.05	2.33	1.59	1.83	1.72	2.29	1.65	2.26	2.1	1.65
67.348	4-(2-Furyl)-3-buten-2-one	0.25	0.38	0.33	0.35	0.32	0.46	0.34	0.39	0.28	0.4	0.34	0.4	0.42	0.26
69.246	2,2'-Difurfury ether	0.36	0.78	0.47	0.78	0.61	0.95	0.65	0.82	0.64	0.87	0.56	1.04	0.66	1.37
69.533	Methyl 2-furoate	0.35	0.33	0.32	0.32	0.41	0.52	0.37	0.33	0.36	0.38	0.35	0.27	0.35	0.23
71.133	Furaneol	2.04	1.78	2.22	1.86	2.55	2.09	2.11	1.73	2.12	2.1	2.26	1.8	2.63	1.27
80.805	2,3-Dihydrobenzofuran	0.71	0.38	0.35	0.41	0.68	0.52	0.47	0.45	0.42	0.49	0.44	0.41	0.51	0.43
83.94	5-Hydroxymethylfurfural	1.63	0.82	1.29	0.79	1.89	1.06	1.41	0.89	1.32	0.98	1.48	0.77	1.68	0.34
	Ketones	15.42	11.59	13.77	12.75	14.41	16.06	13.53	14.61	16.23	17.66	15.74	12.84	13.95	15.17
5.219	2,3-Butanedione	0.51	0.19	0.37	0.21	0.18	0.39	0.34	0.44	0.35	0.35	0.4	0.26	0.25	0.23
7.858	2,3-Pentanedione	ND	0.42	0.64	0.55	0.46	0.45	0.4	0.43	0.81	0.45	0.48	0.36	0.42	0.49
20.608	Acetoin	0.83	0.5	0.44	0.58	0.56	0.68	0.56	0.59	0.74	0.72	0.91	0.43	0.49	0.65
21.728	1-Hydroxy-2-propanone	4.17	1.61	2.06	1.43	2.66	2.3	2.09	1.72	2.34	2.73	3.12	1.2	1.39	1.57
24.763	3-Hydroxy-3-methyl-2-butanone	0.26	0.26	0.31	0.26	0.23	0.24	0.23	0.24	0.32	0.27	0.26	0.24	0.25	0.26
27.171	1-Hydroxy-2-butanone	0.65	0.35	0.36	0.43	0.42	0.38	0.47	0.35	0.49	0.44	0.57	0.39	0.46	0.32
35.043	1-Acetyloxy-2-propanone	2.47	2.46	2.83	2.95	2.46	3.84	2.6	3.39	3.87	4.09	2.87	3.2	2.73	3.71
40.24	2-oxobutyl acetate	1.19	1.69	1.17	1.3	1.34	1.66	1.08	1.21	1.58	1.7	1.1	1.04	1.47	1.33
65.156	3-Ethyl-2-hydroxy-2-cyclopenten-1-one	0.85	1.04	0.75	0.87	0.98	1.23	0.81	0.85	0.89	1.23	0.94	0.78	0.87	1.12
71.544	5-Acetyldihydrofuran-2(3H)-one	0.52	0.39	0.53	0.62	0.59	0.58	0.46	0.49	0.54	0.71	0.56	0.54	0.65	0.65
75.833	1-(2-Hydroxy-5-methylphenyl) ethanone	2.43	2.04	2.8	2.93	3.78	3.56	2.63	3.16	3.21	3.99	3.26	3.63	3.14	3.2
76.54	2',5'-Dihydroxyacetophenone	ND	0.41	0.4	0.62	0.75	0.52	0.4	0.49	ND	0.67	ND	0.5	0.45	0.59
76.818	2,6-Dimethyl-3,5-heptanedione	ND	0.23	0.21	ND	ND	0.23	0.25	0.29	ND	0.31	0.25	0.27	0.26	ND
77.732	2,3-Dihydro-3,5-dihydroxy-6-methyl-4(H)-pyran-4-one	1.54	ND	0.9	ND	ND	ND	1.21	0.96	1.09	ND	1.02	ND	1.12	1.05
	Aldehydes	0.93	1.02	0.82	0.9	0.58	0.96	0.77	0.79	0.85	0.91	1.03	0.71	0.69	0.89
3.875	2-Methylbutyraldehyde	0.6	0.65	0.56	0.65	0.4	0.73	0.5	0.56	0.59	0.58	0.69	0.37	0.44	0.67
66.557	2-Phenyl-2-butenal	0.33	0.37	0.26	0.25	0.18	0.23	0.27	0.23	0.26	0.33	0.34	0.34	0.25	0.22
	Esters	3.71	3.77	3.88	3.51	3.72	3.54	3.76	3.98	4.05	4.13	3.88	3.93	3.89	3.77
31.382	alpha-Angelica lactone	ND	ND	0.12	ND	0.19	0.11	0.13	0.14	0.17	0.11	ND	ND	ND	ND
39.94	Propanoicacid,ethenylester	2.02	2.23	2.15	2.21	1.9	2.09	1.91	2.01	2.13	2.19	2.12	1.88	1.88	1.62
43.04	2-Methylenebutyrolactone	0.29	ND	0.27	ND	0.28	ND	ND	ND	0.26	ND	ND	ND	0.27	0.23
47.637	Glycidyl methacrylate	0.45	0.59	0.42	0.53	0.39	0.49	0.42	0.49	0.48	0.55	0.44	0.47	0.37	0.5
54.93	2(5H)-Furanone	0.46	0.48	0.39	0.36	0.33	0.33	0.36	0.34	0.39	0.38	0.37	0.35	0.37	0.31
56.643	Methyl salicylate	0.2	ND	0.21	ND	0.25	ND	0.27	0.3	ND	ND	0.32	0.42	0.34	0.39
74.93	3-Hydroxydihydrofuran-2(3H)-one	0.29	0.47	0.32	0.41	0.38	0.32	0.33	0.35	0.34	0.49	0.33	0.42	0.31	0.33
83.006	(S)-5-(Hydroxymethyl)dihydrofuran-2(3H)-one	ND	ND	ND	ND	ND	0.2	0.34	0.35	0.28	0.41	0.3	0.39	0.35	0.39
	Alcohols	0.26	0.95	0.4	1.11	0.41	1.01	0.72	0.77	0.71	0.96	0.88	1.04	0.44	1.06
57.585	1-(3-Aminophenyl)ethanol	ND	0.64	ND	0.72	ND	0.66	0.48	0.55	0.46	0.65	0.56	0.67	ND	0.71
72.081	5-Methyl-2-pyrazinylmethanol	0.26	0.31	0.4	0.39	0.41	0.35	0.24	0.22	0.25	0.31	0.32	0.37	0.44	0.35
	Phenols	2.99	6.73	4.39	5.48	5	6.29	5.32	5.83	5.2	6.83	3.95	6.57	4.46	6.55
62.905	Dihydropyrimidine-2,4,5(3H)-trione	ND	0.63	0.97	0.53	0.87	0.55	0.9	0.61	0.84	0.48	0.68	0.31	0.93	ND
68.304	Maltol	1.81	2.62	2.09	2.45	2.73	2.48	2.39	2.61	2.17	2.88	1.97	2.85	2.38	3.21
70.024	Phenol	0.65	0.77	0.46	0.69	0.64	0.71	0.57	0.68	0.49	0.71	0.29	0.68	0.37	0.76
70.817	4-Ethyl-2-methoxyphenol	0.53	1.46	0.52	1.35	0.76	1.5	0.95	1.38	0.88	1.73	0.77	1.76	0.46	1.79
72.829	3-Methylphenol	ND	0.57	ND	ND	ND	0.48	ND	ND	0.41	0.5	ND	0.46	ND	0.35
78.573	4-Aminophenol	ND	0.68	0.35	0.46	ND	0.57	0.51	0.55	0.41	0.53	0.24	0.51	0.32	0.44
	Acids	10.26	5.68	8.26	7.37	7.4	4.98	8.49	6.81	2.05	1.42	6.03	8.36	6.78	5.94
33.248	Acetic acid	8.67	4.38	6.58	5.85	5.61	3.97	6.95	5.21	ND	ND	4.52	6.83	4.99	4.31
50.84	Isovaleric acid	1.59	1.3	1.68	1.52	1.79	1.01	1.54	1.6	2.05	1.42	1.51	1.53	1.79	1.63
	Pyrazines	19.57	19.62	20.11	17.39	21.06	17.98	19.17	18.2	23.08	17.33	21.35	16.97	20.97	16.89
15.728	Pyrazine	0.79	0.9	0.57	0.68	0.58	0.67	0.73	0.65	0.78	0.67	0.78	0.71	0.63	0.65
19.363	2-Methylpyrazine	4.77	4.26	4.46	3.95	4.45	4.27	4.15	4.18	5.33	3.87	4.27	3.46	4.06	3.29
23.472	2,5-Dimethylpyrazine	3.05	2.44	2.78	2.3	2.84	2.15	2.43	2.31	3.06	2.04	2.69	2.1	2.75	1.98
23.969	2,6-Dimethylpyrazine	2.88	2.48	2.74	2.32	2.74	2.21	2.31	2.35	2.99	2.13	2.7	2.11	2.76	2.13
24.346	2-Ethylpyrazine	1.59	1.16	1.35	1.12	1.49	1.21	1.23	1.03	1.62	1.03	1.72	0.88	1.15	1.12
25.218	2,3-Dimethylpyrazine	0.81	0.77	0.75	0.7	0.72	0.64	0.73	0.67	0.89	0.61	0.85	0.62	0.69	0.67
28.291	2-Ethyl-6-methylpyrazine	ND	2.46	2.19	2.24	2.57	2.52	2.55	2.53	2.69	2.43	2.71	2.63	3.17	2.47
28.767	2-Ethyl-5-methylpyrazine	1.86	1.61	1.71	0.93	1.56	1.31	1.76	1.58	1.83	1.34	1.85	1.04	2.13	1.42
29.744	2,3,5-Trimethylpyrazine	2.49	2.32	2.44	2.05	2.43	1.89	2.18	1.98	2.6	1.84	2.41	2.09	2.59	1.93
36.619	2-Methyl-5-vinylpyrazine	0.58	0.49	0.47	0.47	0.46	ND	0.46	0.33	0.52	0.24	0.52	ND	0.39	ND
46.235	Acetylpyrazine	0.75	0.73	0.65	0.63	0.69	0.6	0.64	0.59	0.77	0.58	0.85	0.63	0.65	0.6
69.369	4-methyl-Pyrrolo[1,2-a]pyrazine	ND	ND	ND	ND	0.53	0.51	ND	ND	ND	0.55	ND	0.7	ND	0.63
	Pyridines	5.7	7.28	5.89	7.42	4	4.57	5.45	6.37	4.76	5.16	4.67	5.03	3.2	5.81
13.984	Pyridine	2.88	3.49	2.69	3.41	2.07	2.68	2.45	3.04	2.49	2.49	2.36	2.38	1.26	3.35
27.731	3-Ethylpyridine	ND	0.32	0.27	0.39	ND	0.11	ND	0.24	0.18	0.09	ND	ND	ND	0.26
44.399	2-Acetylpyridine	0.63	0.59	0.56	0.65	0.32	0.21	0.53	0.52	0.37	0.32	0.36	0.29	0.18	0.27
57.29	3-Acetoxypyridine	1.07	0.98	0.93	0.95	0.59	0.5	0.92	0.84	0.7	0.66	0.71	0.66	0.69	0.49
80.981	6-Methyl-3-pyridinol	ND	0.55	0.47	0.57	0.27	0.21	0.52	0.51	0.28	0.33	0.35	0.35	0.27	0.3
81.446	3-Pyridinol	1.12	1.35	0.97	1.45	0.75	0.86	1.03	1.22	0.74	1.27	0.89	1.35	0.8	1.14
	Pyrroles	7.42	8.38	7.35	8.02	6.47	6.2	7.4	7.55	6.53	5.95	6.64	7.8	6.41	7.94
38.516	Pyrrole	0.29	0.38	0.28	0.3	0.32	0.2	0.25	0.29	0.28	0.25	0.19	0.21	0.23	0.23
45.678	1-Methylpyrrole-2-carboxaldehyde	1.53	1.65	1.93	1.85	1.45	1.39	1.87	1.59	1.43	ND	1.81	1.66	1.92	2.63
47.333	N-Methylpyrrole-2-acetonitrile	1.58	0.74	0.62	0.62	0.5	0.49	0.6	0.62	0.61	0.55	0.52	0.49	0.5	0.5
48.498	2-Acetyl-1-methylpyrrole	0.53	0.8	0.64	0.74	0.49	0.56	0.61	0.69	0.62	0.65	0.57	0.67	0.55	0.69
68.581	2-Acetyl pyrrole	1.62	1.93	1.65	1.84	1.56	1.53	1.74	1.79	1.57	1.87	1.52	2	1.36	1.83
70.466	Pyrrole-2-carboxaldehyde	1.11	1.59	1.33	1.43	1.18	1.09	1.35	1.38	1.17	1.39	1.12	1.48	0.95	1.13
73.091	1-(4-methylphenyl)pyrrole-2-carbaldehyde	0.76	1.29	0.9	1.24	0.97	0.94	0.98	1.19	0.85	1.24	0.91	1.29	0.9	0.93
	Others	1.01	1.54	1.06	1.59	1.01	1.85	1.67	0.98	0.77	1.86	1.4	2.15	1.47	1.42
15.115	Dodecane	0.44	0.69	0.45	0.6	ND	0.21	0.23	0.13	ND	ND	ND	0.77	0.35	ND
26.123	Glycidyl Methyl Ether	0.23	0.22	0.28	0.28	0.43	0.31	0.21	0.2	0.24	0.22	0.29	0.27	0.22	0.19
56.794	3-Acetylthiophene	ND	0.3	ND	0.33	ND	ND	ND	0.24	0.26	0.28	ND	ND	ND	0.15
65.266	Difurfuryldisulfide	ND	ND	ND	ND	ND	ND	ND	0.23	ND	ND	ND	0.43	ND	0.27
65.542	Methyl furfuryl disulfide	ND	ND	ND	ND	ND	0.3	ND	0.18	ND	0.21	ND	0.29	0.12	0.21
77.953	Caffeine	ND	ND	ND	ND	ND	0.56	0.92	ND	ND	0.76	0.73	ND	0.48	0.31
82.074	Indole	0.34	0.33	0.33	0.38	0.58	0.47	0.31	ND	0.27	0.39	0.38	0.39	0.3	0.29
