# Supplementary material for: Optimizing drip fertigation at different periods to improve yield, volatile compounds and cup quality of Arabica coffee
Source: Front Plant Sci. 2023 Jun 2;14:1148616. doi: 10.3389/fpls.2023.1148616 (PMC10272449; doi:10.3389/fpls.2023.1148616)
Supplement: Supplementary file 2 [file DataSheet_2.xlsx]

## Sheet: normalization
Weighted normalization of evaluation index
	Anet	Tr	gs	LWUE	CE	Yield	Ash	Total sugar	Fat	Protein	Caffeine	Chlorogenic acid	M-Aroma	M-Flavor	M-Aftertaste	M-Acidity	M-Body	M-Balance	M-Overall	M-Total Score	M- Cleanliness	M-Uniformity	M-Sweetness	D-Aroma	D-Flavor	D-Aftertaste	D-Acidity	D-Body	D-Balance	D-Overall	D-STotal Score	D- Cleanliness	D-Uniformity	D-Sweetness
FL250BE250BR250	0.381602	0.368584	0.367942	0.391737	0.382971	0.384641	0.390974	0.376961	0.376271	0.373747	0.366534	0.376353	0.377642	0.377033	0.375611	0.379747	0.374648	0.379751	0.371879	0.377133	0.377964	0.377964	0.377964	0.373769	0.37665	0.388716	0.3788	0.379946	0.375696	0.376214	0.378372	0.377964	0.377964	0.377964
FL150BE250BR350	0.357571	0.355853	0.363451	0.373284	0.343956	0.381462	0.370581	0.370717	0.372695	0.371309	0.398561	0.36967	0.371044	0.370216	0.375611	0.373671	0.374648	0.379751	0.374957	0.375646	0.377964	0.377964	0.377964	0.366955	0.369783	0.369691	0.375462	0.373915	0.378858	0.373075	0.374565	0.377964	0.377964	0.377964
FL150BE350BR250	0.37138	0.371913	0.380216	0.371175	0.362205	0.40113	0.398709	0.39668	0.397984	0.402028	0.434147	0.420911	0.383733	0.383326	0.385094	0.379747	0.39409	0.379751	0.384703	0.38206	0.377964	0.377964	0.377964	0.38006	0.37665	0.369691	0.372125	0.3709	0.375696	0.379354	0.376022	0.377964	0.377964	0.377964
FL250BE150BR350	0.365332	0.350577	0.36375	0.380665	0.355503	0.313949	0.348079	0.342781	0.362221	0.347416	0.373651	0.329886	0.377642	0.360777	0.362441	0.370127	0.357833	0.370131	0.368802	0.370997	0.377964	0.377964	0.377964	0.373769	0.37665	0.363007	0.372125	0.379946	0.382019	0.369412	0.375458	0.377964	0.377964	0.377964
FL250BE350BR150	0.3927	0.401636	0.394587	0.376447	0.392724	0.418245	0.416288	0.413441	0.38981	0.426164	0.384327	0.43587	0.383733	0.390143	0.391942	0.382785	0.390937	0.382789	0.391371	0.384106	0.377964	0.377964	0.377964	0.39002	0.382989	0.382546	0.389368	0.373915	0.375696	0.382493	0.380722	0.377964	0.377964	0.377964
FL350BE150BR250	0.37401	0.385665	0.384408	0.36643	0.383065	0.354183	0.348782	0.353627	0.363499	0.348879	0.338065	0.321134	0.371044	0.38018	0.375611	0.376709	0.374648	0.379751	0.371879	0.376529	0.377964	0.377964	0.377964	0.373769	0.37665	0.382546	0.3788	0.383464	0.375696	0.382493	0.378654	0.377964	0.377964	0.377964
FL350BE250BR150	0.401293	0.407729	0.390096	0.38541	0.420097	0.383006	0.367065	0.38682	0.381891	0.369846	0.341624	0.377627	0.380688	0.383326	0.378772	0.382785	0.377801	0.373675	0.381625	0.379132	0.377964	0.377964	0.377964	0.386875	0.386159	0.388716	0.3788	0.383464	0.382019	0.382493	0.381897	0.377964	0.377964	0.377964
	0.0294106	0.0292986	0.0293816	0.0294184	0.0294389	0.0293685	0.0293546	0.0293586	0.0294139	0.029338	0.0293347	0.02923	0.0294384	0.0294254	0.0294265	0.0294384	0.0294181	0.0294412	0.0294294	0.0294389	0.0294467	0.0294467	0.0294467	0.0294311	0.0294398	0.02943	0.0294382	0.0294477	0.0294478	0.0294389	0.0294436	0.0294467	0.0294467	0.0294467
	0.0118023	0.012254	0.0119797	0.0116081	0.0115323	0.0123376	0.01222	0.0121381	0.0117062	0.0125028	0.0127356	0.0127405	0.0112965	0.0114801	0.0115335	0.0112686	0.0115934	0.0112698	0.0115178	0.0113076	0.0111298	0.0111298	0.0111298	0.0114787	0.0113684	0.0114399	0.0114623	0.0112921	0.0112496	0.0112602	0.0112444	0.0111298	0.0111298	0.0111298
	0.0105164	0.00919828	0.0103005	0.0106921	0.0107873	0.0101015	0.0102177	0.0100636	0.0106543	0.0101925	0.00991706	0.00938674	0.0109229	0.010616	0.0106654	0.0108959	0.0105268	0.0108971	0.0108536	0.0109217	0.0111298	0.0111298	0.0111298	0.0107999	0.0108863	0.0106833	0.0109547	0.0109221	0.0110634	0.0108751	0.0110286	0.0111298	0.0111298	0.0111298
